# Supplementary material for: Synthesis of 2D MoO3−x/N-doped-carbon nanocomposites via in situ carbonization of layered (NH4)Mo3O9–(NH4)2Mo4O13-organic hybrid nanomaterials for exceptionally efficient adsorption and separation of organic dyes
Source: Royal Society of Chemistry journal article supplement (doi:10.1039/d2en00668e), 2022-01-01
Supplement: d2en00668e1.pdf [file d2en00668e1.pdf]

## Supporting Information

### **Synthesis of 2D MoO<sub>3-x</sub>/N-doped-Carbon Nanocomposite via *in situ* Carbonization of Layered (NH<sub>4</sub>)Mo<sub>3</sub>O<sub>9</sub>-(NH<sub>4</sub>)<sub>2</sub>Mo<sub>4</sub>O<sub>13</sub>-Organic Hybrid Nanomaterials for Exceptionally Efficient Adsorption and Separation of Organic Dye**

*Supriya Hanmant Gaikwad*<sup>a, b</sup> and *Shatabdi Porel Mukherjee*<sup>\* a, b</sup>

<sup>a</sup> Physical and Materials Chemistry Division, CSIR-National Chemical Laboratory (CSIR-NCL), Dr. Homi Bhabha Road, Pashan, Pune 411008, India,

<sup>b</sup> Academy of Scientific and Innovative Research (AcSIR), Ghaziabad-201002, India

Email: [sp.mukherjee@ncl.res.in](mailto:sp.mukherjee@ncl.res.in)

## Table of Contents

**Figure S1.** TEM-EDS elemental analysis of MoO<sub>3-x</sub>/N-C nanocomposite.

**Figure S2.** XPS survey spectra of (a) AMO-hybrid and (b) MoO<sub>3-x</sub>/N-C nanocomposite.

**Figure S3.** UV-vis-NIR diffuse reflectance spectra of AMO-hybrid and MoO<sub>3-x</sub>/N-C nanocomposite.

**Figure S4.** Typical ‘Tauc’ plots for calculating optical band gaps of MoO<sub>3-x</sub>/N-C nanocomposite.

**Figure S5.** Raman spectra of MoO<sub>3-x</sub>/N-C nanocomposite obtained at a laser power of 0.02 mW.

**Figure S6.** TGA analysis of AMO-hybrid and MoO<sub>3-x</sub>/N-C nanocomposite.

**Figure S7.** FT-IR spectra of samples; AMO-hybrid, MoO<sub>3-x</sub>/N-C nanocomposite.

**Figure S8.** (a) N<sub>2</sub> adsorption/desorption isotherm and (b) pore size distribution calculated using DFT method slit pore model for AMO-hybrid and MoO<sub>3-x</sub>/N-C nanocomposite.

**Table S1.** List of parameters deduced from nitrogen adsorption/desorption analysis of AMO-hybrid and MoO<sub>3-x</sub>/N-C nanocomposite.

**Figure S9.** Comparison of adsorption capacity of as-synthesized MoO<sub>3-x</sub>/N-C nanocomposite, AMO-hybrid and commercial MoO<sub>3</sub> on 100 ppm MB solution.\*

\*(C<sub>0</sub>= 100 mg/L, M= 0.005 g, V= 0.005 L, T=160 min)

**Figure S10.** Adsorption kinetic plot of MB adsorbed on MoO<sub>3-x</sub>/N-C nanocomposite fitted with intraparticle diffusion model.\*

\*(C<sub>0</sub>= 100 mg/L, M= 0.005 g, V= 0.005 L, T=160 min)

**Table S2.** Adsorption kinetic parameters of MB adsorption onto MoO<sub>3-x</sub>/N-C nanocomposite by nonlinear pseudo-first order, nonlinear pseudo-second order and intraparticle diffusion model.

**Table S3.** Comparison of this work with previously reported literatures.

**Figure S11.** Zeta potential of  $\text{MoO}_{3-x}/\text{N-C}$  nanocomposite at various pH (1, ~7 and 9).

**Figure S12.** FT-IR spectra  $\text{MoO}_{3-x}/\text{N-C}$  nanocomposite, MB, MB adsorbed on  $\text{MoO}_{3-x}/\text{N-C}$  nanocomposite.

**Figure S13.** Schematic diagram of probable adsorption mechanism for  $\text{MoO}_{3-x}/\text{N-C}$  nanocomposite.

**Figure S14:** UV-vis spectra of a binary mixture composed with 50 ppm each of (a) MB and CV, (b) MB and MG, (c) MB and RhB solution before and after addition of  $\text{MoO}_{3-x}/\text{N-C}$  nanocomposite to equilibrate for 10-60 minutes in the dark; inset shows the color of the MB solution (i) before adsorption, (ii) after adsorbed by  $\text{MoO}_{3-x}/\text{N-C}$  nanocomposite, respectively for (a), (b) and (c).

**Figure S15.** XRD pattern of the  $\text{MoO}_{3-x}/\text{N-C}$  nanocomposite before and after corroded for 3 h using 2(M) HCl and 2(M) NaOH solution at pH 1 and pH 9 respectively.

## References

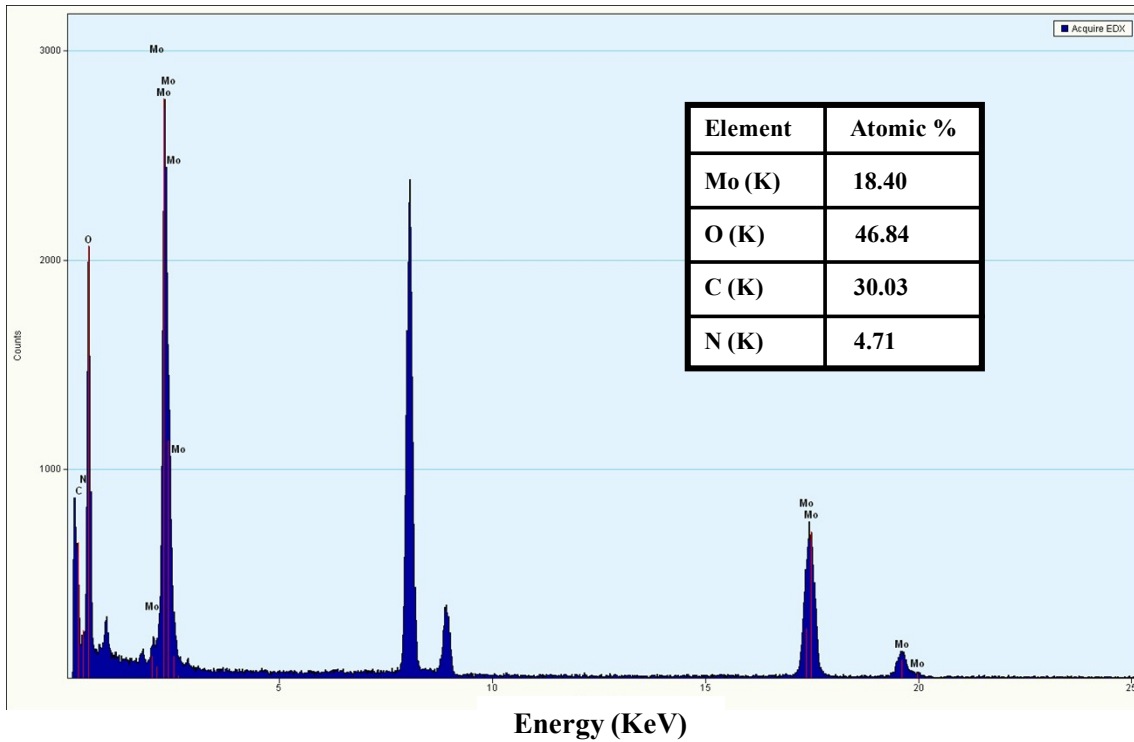

**Figure S1.** TEM-EDS elemental analysis of MoO<sub>3-x</sub>/N-C nanocomposite.

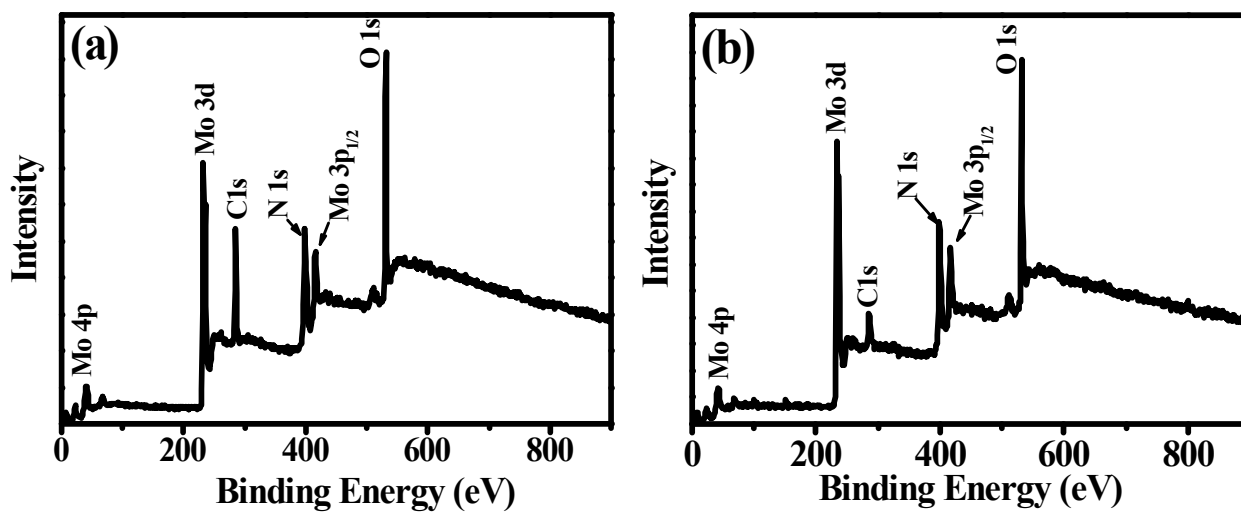

**Figure S2.** XPS survey spectra of (a) AMO-hybrid and (b) MoO<sub>3-x</sub>/N-C nanocomposite.

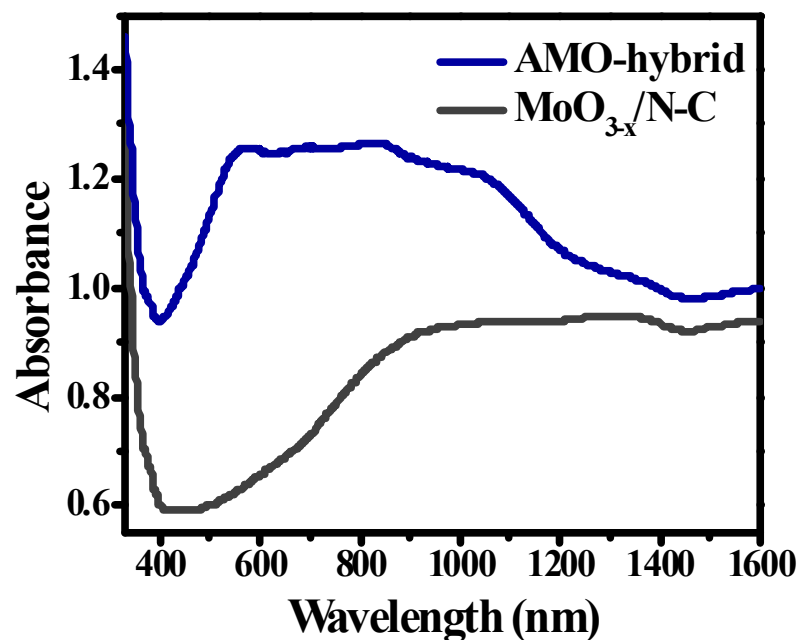

**Figure S3.** UV-vis-NIR diffuse reflectance spectra of AMO-hybrid and MoO<sub>3-x</sub>/N-C nanocomposite.

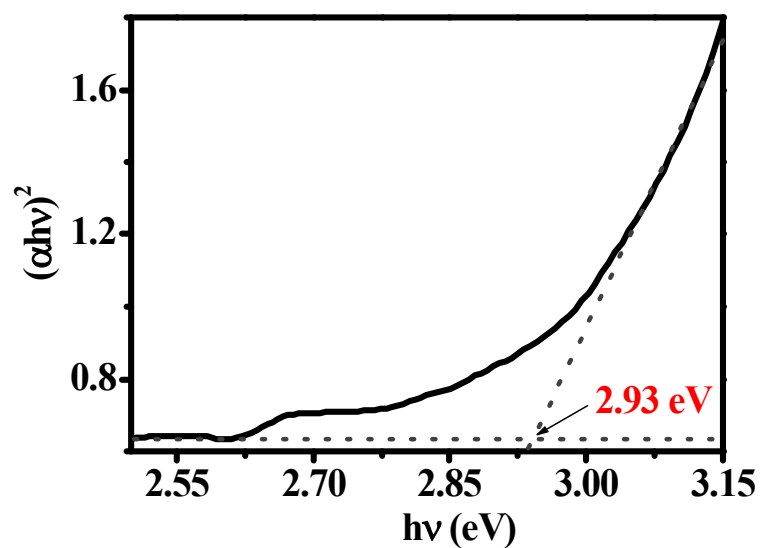

**Figure S4.** Typical 'Tauc' plots for calculating optical band gaps of MoO<sub>3-x</sub>/N-C nanocomposite.

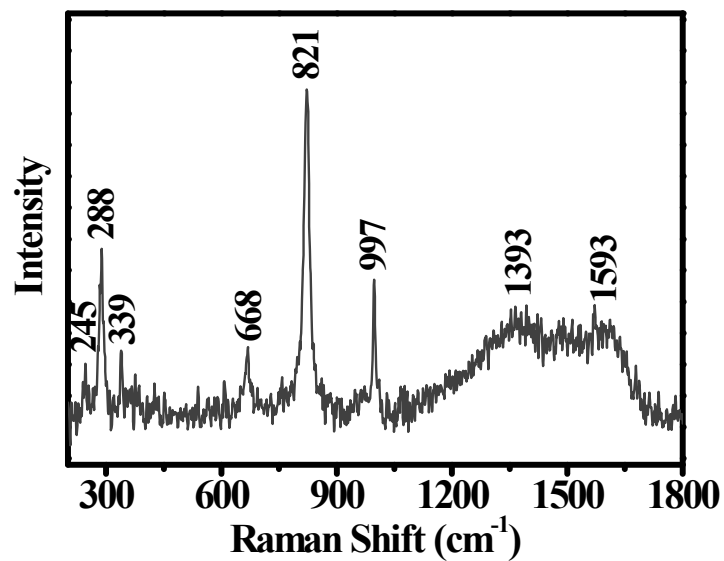

**Figure S5.** Raman spectra of MoO<sub>3-x</sub>/N-C nanocomposite obtained at a laser power of 0.02 mW.

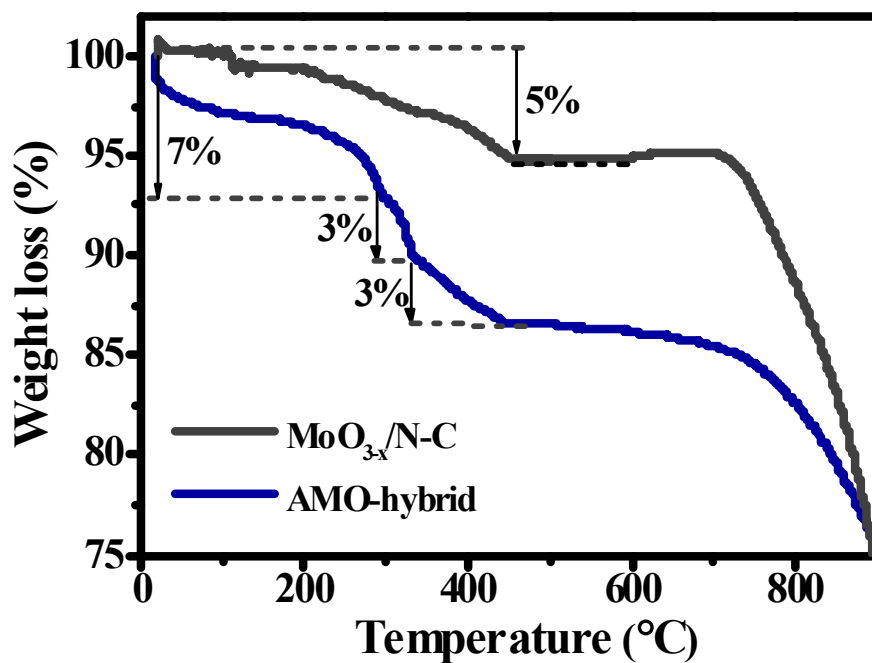

**Figure S6.** TGA analysis of AMO-hybrid and MoO<sub>3-x</sub>/N-C nanocomposite.

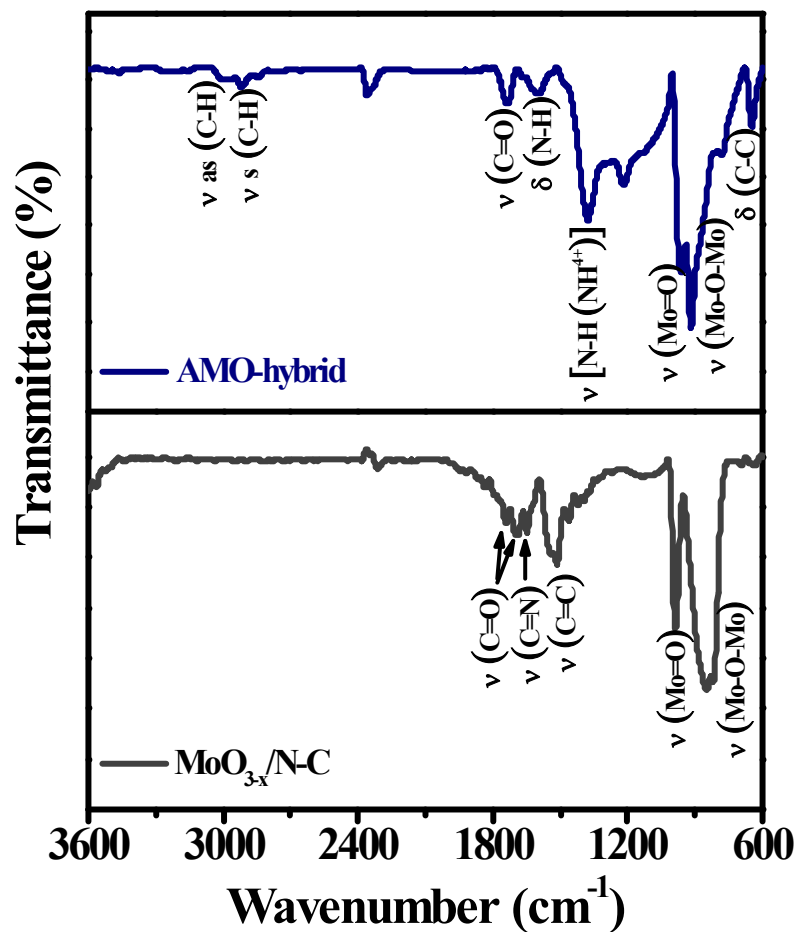

**Figure S7.** FT-IR spectra of samples; AMO-hybrid,  $\text{MoO}_{3-x}/\text{N-C}$  nanocomposite.\*

\* ( $\nu$  = stretching vibration,  $\nu_{\text{s}}$  = symmetric stretching vibration,  $\nu_{\text{as}}$  = asymmetric stretching vibration,  $\delta$  = bending vibration.)

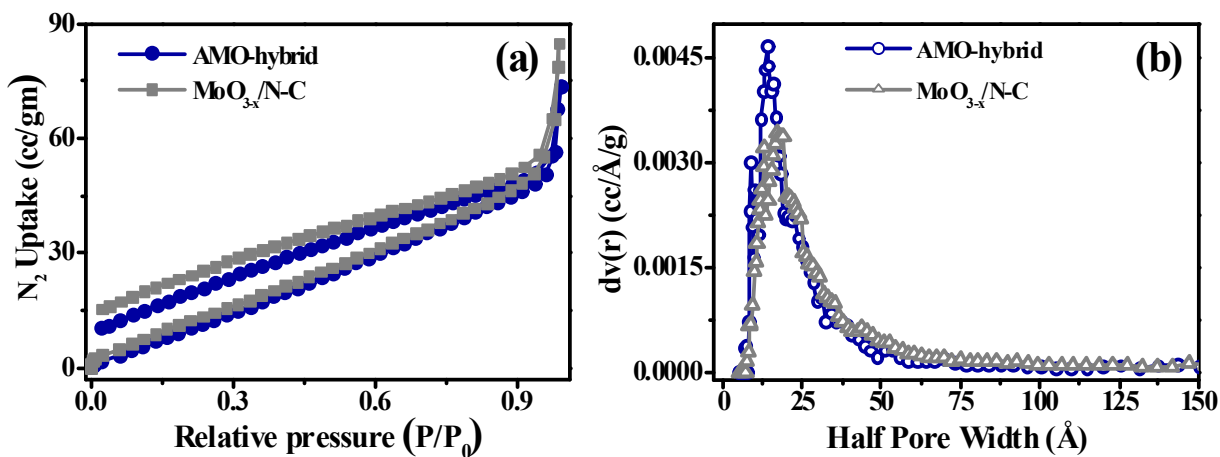

**Figure S8.** (a) N<sub>2</sub> adsorption/desorption isotherm and (b) pore size distribution calculated using DFT method slit pore model for AMO-hybrid and MoO<sub>3-x</sub>/N-C nanocomposite.

**Table S1.** List of parameters deduced from nitrogen adsorption/desorption analysis of AMO-hybrid and MoO<sub>3-x</sub>/N-C nanocomposite.

| Sample                                | Surface Area (m <sup>2</sup> /g) | Half pore width (Å) | Pore Volume (cc/g) |
|---------------------------------------|----------------------------------|---------------------|--------------------|
| AMO-hybrid                            | 80.895                           | 13.84               | 0.078              |
| MoO <sub>3-x</sub> /N-C nanocomposite | 69.897                           | 17.16               | 0.090              |



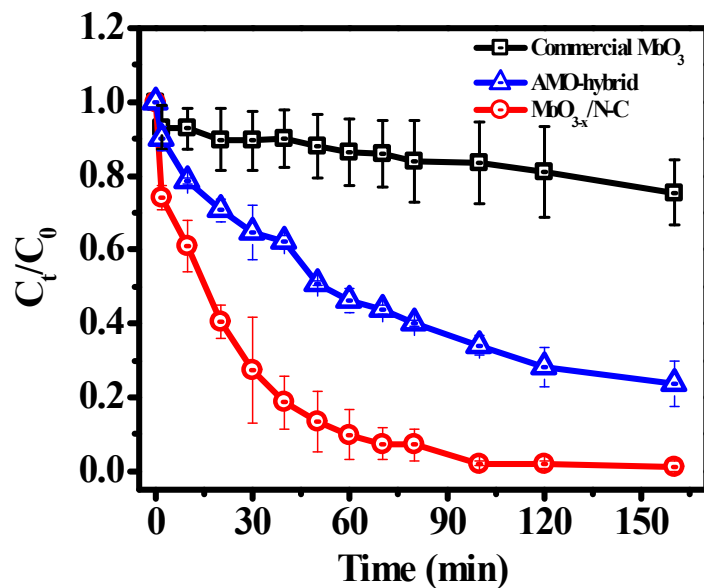

**Figure S9.** Comparison of adsorption capacity of as-synthesized MoO<sub>3-x</sub>/N-C nanocomposite, AMO-hybrid and commercial MoO<sub>3</sub> on 100 ppm MB solution.\*

\*(C<sub>0</sub>= 100 mg/L, M= 0.005 g, V= 0.005 L, T=160 min)

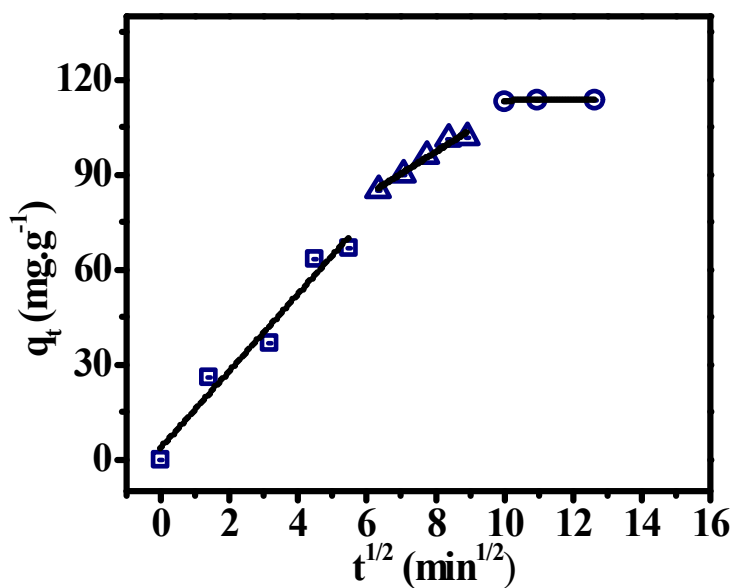

**Figure S10.** Adsorption kinetic plot of MB adsorbed on MoO<sub>3-x</sub>/N-C nanocomposite fitted with intraparticle diffusion model.\*

\*(C<sub>0</sub>= 100 mg/L, M= 0.005 g, V= 0.005 L, T=160 min)

**Table S2.** Adsorption kinetic parameters of MB adsorption onto MoO<sub>3-x</sub>/N-C nanocomposite by nonlinear pseudo-first order, nonlinear pseudo-second order and intraparticle diffusion model.\*

| <b>Models</b>                 |         | <b>Parameters</b>                                             | <b>Values</b> |
|-------------------------------|---------|---------------------------------------------------------------|---------------|
| Pseudo first order model      |         | $k_1$                                                         | 0.035         |
|                               |         | $q_{e, \text{exp}} \text{ (mg.g}^{-1}\text{)}$                | 113.58        |
|                               |         | $q_{e, \text{cal1}} \text{ (mg.g}^{-1}\text{)}$               | 112.18        |
|                               |         | $R^2$                                                         | 0.96          |
|                               |         | $\chi^2$                                                      | 0.50          |
| Pseudo second order model     |         | $k_2$                                                         | 0.00031       |
|                               |         | $q_{e, \text{exp}} \text{ (mg.g}^{-1}\text{)}$                | 113.58        |
|                               |         | $q_{e, \text{cal2}} \text{ (mg.g}^{-1}\text{)}$               | 134.31        |
|                               |         | $R^2$                                                         | 0.98          |
|                               |         | $\chi^2$                                                      | 0.36          |
| Intraparticle diffusion model | Stage 1 | $K_{\text{di}} \text{ (mg.g}^{-1} \text{ min}^{-0.5}\text{)}$ | 12.17         |
|                               |         | $C_i$                                                         | 3.17          |
|                               |         | $R^2$                                                         | 0.97          |
|                               | Stage 2 | $K_{\text{di}} \text{ (mg.g}^{-1} \text{ min}^{-0.5}\text{)}$ | 8.86          |
|                               |         | $C_i$                                                         | 41.84         |
|                               |         | $R^2$                                                         | 0.96          |
|                               | Stage 3 | $K_{\text{di}} \text{ (mg.g}^{-1} \text{ min}^{-0.5}\text{)}$ | 0.18          |
|                               |         | $C_i$                                                         | 111.34        |
|                               |         | $R^2$                                                         | 0.93          |

\* $q_{e, \text{cal}}$  represent the calculated equilibrium adsorption capacity based on kinetic models,  $q_{e, \text{exp}}$  is the experimental equilibrium adsorption capacity,  $K_{\text{di}}$  is the diffusion rate constant based on intraparticle diffusion (Weber-Morris) model.

**Table S3.** Comparison of this work with previously reported literatures.

| Sr. No | Material                                                   | Surface area (m <sup>2</sup> /g) | Adsorbate     | Maximum adoption capacity Q <sub>max</sub> (mg/g) | Time  | pH      | Recyclability       |                     | Selective adsorption/ separation, Separation efficiency (SE)                                                                                                                                                                                                          | Reference |
|--------|------------------------------------------------------------|----------------------------------|---------------|---------------------------------------------------|-------|---------|---------------------|---------------------|-----------------------------------------------------------------------------------------------------------------------------------------------------------------------------------------------------------------------------------------------------------------------|-----------|
|        |                                                            |                                  |               |                                                   |       |         | Adsorption cycle, % | Desorption cycle, % |                                                                                                                                                                                                                                                                       |           |
| 1      | MoO <sub>3-x</sub> /N-C nanocomposite                      | 70.97                            | MB            | 1360                                              | 72 h  | Neutral | 4, 99 %             | 4, 63-68 %          | Selective adsorption towards cationic dyes (e.g., MB, RhB, SO CV, MG)<br>Selective separation of MO from<br>(i) Binary mixture (MB+MO) : SE = 99.77%<br>(ii) Quaternary mixture (MB+CV+MG+MO) : SE = 75.68%<br>(iii) Pentanary mixture (MB+SO+CV+MG+MO) : SE = 62.42% | This work |
| 2      | Mixed phase MoO <sub>3</sub> nanoparticles                 | 5.17                             | MB            | 141.2                                             | -     | Neutral | -                   | -                   | -                                                                                                                                                                                                                                                                     | 1         |
| 3      | h-MoO <sub>3</sub> rod-like microcrystals                  | -                                | MB            | 317.83                                            | 12h   | 6       | 4, 86%              | -                   | -                                                                                                                                                                                                                                                                     | 2         |
| 4      | MoO <sub>3</sub> /MoO <sub>2</sub> composite nanoparticles | 22.89                            | MB            | 1250                                              | 14 h  | Neutral | 4, 95%              | -                   | -                                                                                                                                                                                                                                                                     | 3         |
| 5      | MoO <sub>3-x</sub> 3D nanoflower                           | -                                | MB<br>RhB, MO | 295.0                                             | 5 min | Neutral | 3, 50%              | -                   | Relatively higher adsorption towards RhB than MB and weak adsorption for MO from a                                                                                                                                                                                    | 4         |

|    |                                                    |      |                                         |                                                  |         |         |          |        |                                                                                                                                                    |    |
|----|----------------------------------------------------|------|-----------------------------------------|--------------------------------------------------|---------|---------|----------|--------|----------------------------------------------------------------------------------------------------------------------------------------------------|----|
|    |                                                    |      |                                         |                                                  |         |         |          |        | ternary mixture containing MB, RhB, and MO                                                                                                         |    |
| 6  | MoO <sub>3</sub> nanospheres                       | -    | MB                                      | 100% (20 ppm)                                    | 1 min   | Neutral | -        | -      | -                                                                                                                                                  | 5  |
| 7  | α-MoO <sub>3</sub> nanocrystals                    | 42   | MB                                      | 152                                              | 160 min | 11      | 4, 99%   | -      | -                                                                                                                                                  | 6  |
| 8  | MoO <sub>3</sub> nanoparticles                     | 14   | MB                                      | 98 % (20 ppm)                                    | 25 min  | Neutral | -        | -      | -                                                                                                                                                  | 7  |
| 9  | α-MoO <sub>3</sub> flower like microsphere         | 17.7 | RhB<br>Methyl red,<br>Alizarin yellow R | 204.08                                           | -       | -       | 5, 98%   | 5, 70% | Selective adsorption towards RhB, methyl red, alizarin yellow R and no adsorption for MB, MO, fuchsin, cresol red, xylenol orange and alizarin red | 8  |
| 10 | α-MoO <sub>3</sub> flowers on carbon cloth         | -    | Rh B<br>MB<br>CV                        | 4974*<br>6217*<br>3886*<br>*(mg/m <sup>2</sup> ) | 10 min  | -       | 5, ~100% | -      | -                                                                                                                                                  | 9  |
| 11 | α-MoO <sub>3</sub> / polyaniline composite         | -    | RhB<br>Congo red                        | 36.36<br>76.22                                   | -       | -       | 4, 82.1% | -      | -                                                                                                                                                  | 10 |
| 12 | MoO <sub>3</sub> nanoparticle anchored in graphene | 68   | MB                                      | 625                                              | -       | Neutral | -        | -      | Selective adsorption towards MB and no adsorption for MO                                                                                           | 11 |

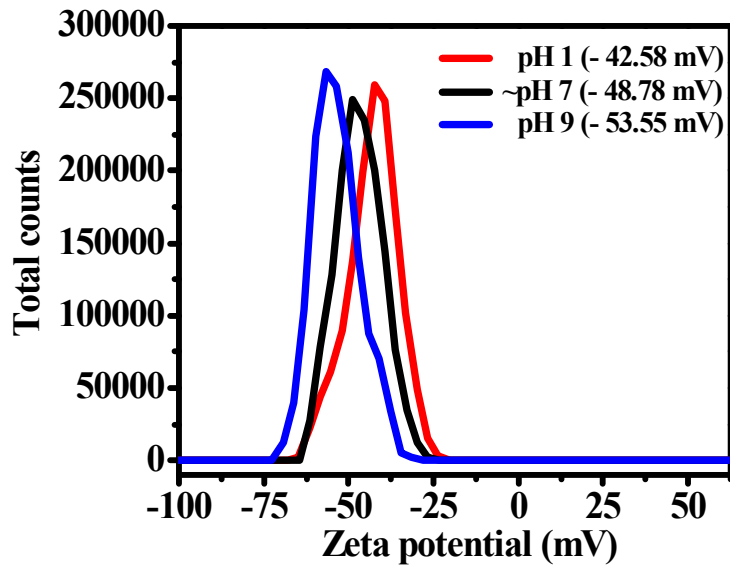

**Figure S11.** Zeta potential of  $\text{MoO}_{3-x}/\text{N-C}$  nanocomposite at various pH (1, ~7 and 9).

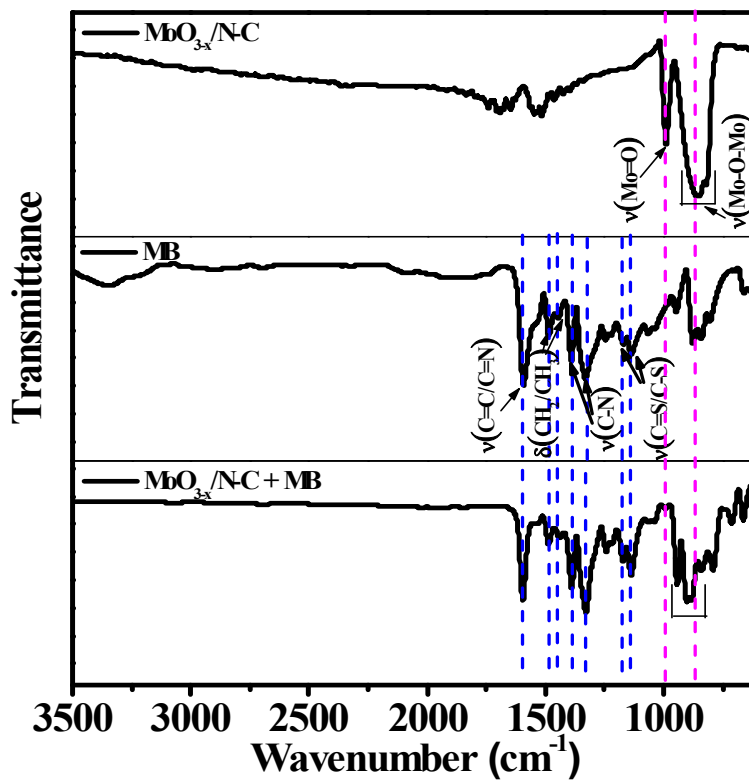

**Figure S12.** FT-IR spectra  $\text{MoO}_{3-x}/\text{N-C}$  nanocomposite, MB, MB adsorbed on  $\text{MoO}_{3-x}/\text{N-C}$  nanocomposite.

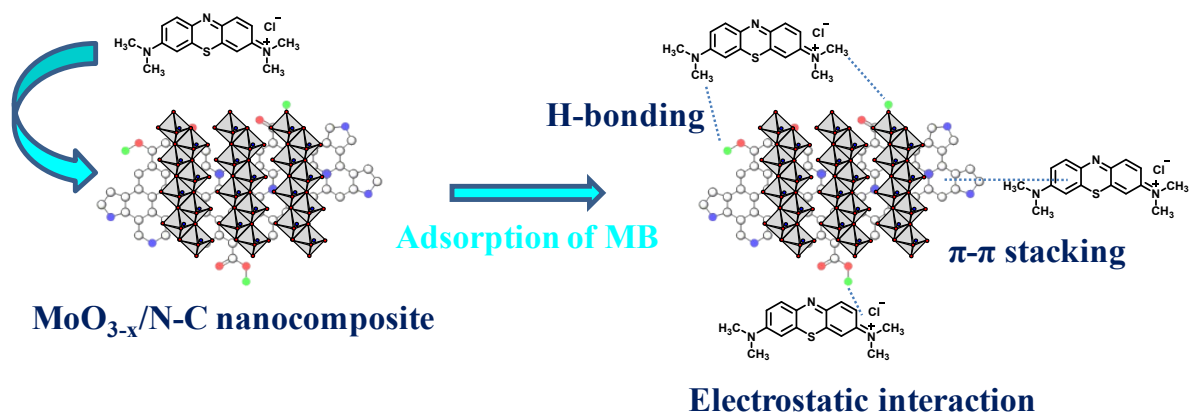

**Figure S13.** Schematic diagram of probable adsorption mechanism for  $\text{MoO}_{3-x}/\text{N-C}$  nanocomposite.

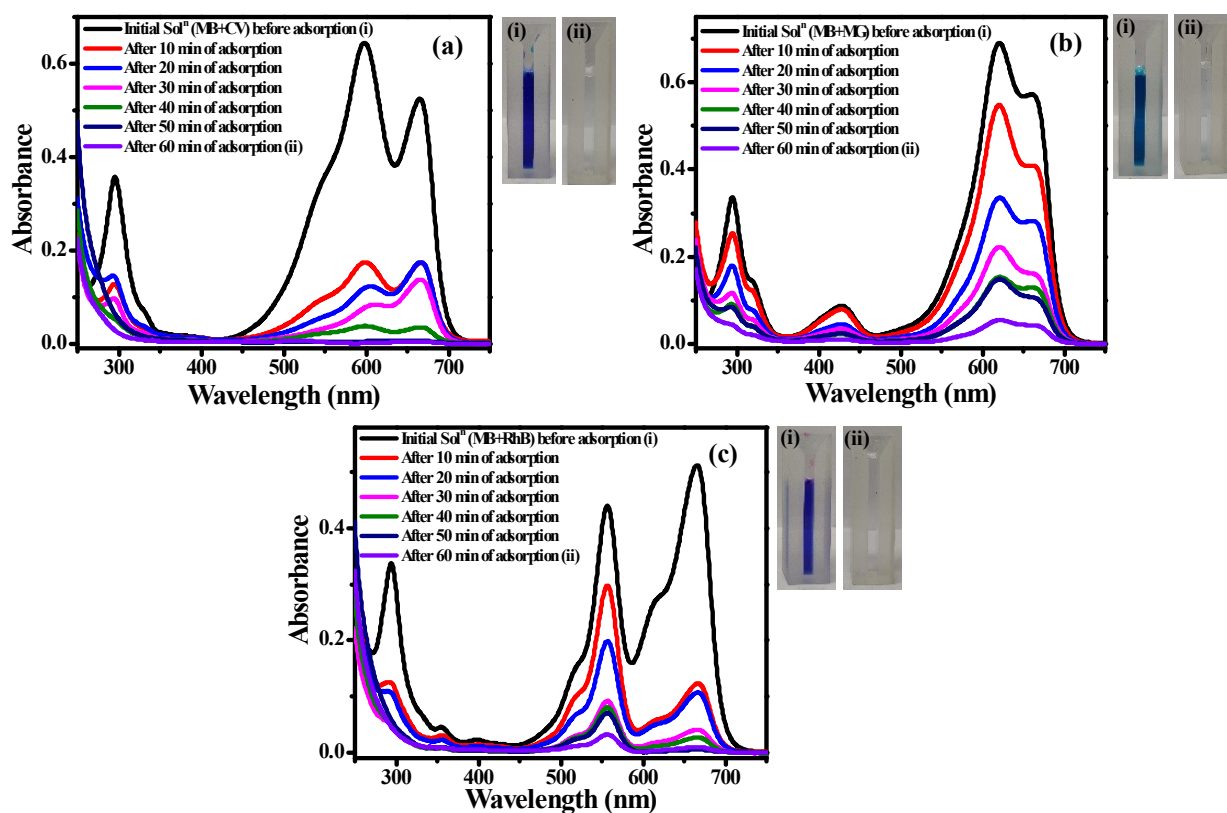

**Figure S14:** UV-vis spectra of a binary mixture composed with 50 ppm each of (a) MB and CV, (b) MB and MG, (c) MB and RhB solution before and after addition of  $\text{MoO}_{3-x}/\text{N-C}$  nanocomposite to equilibrate for 10-60 minutes in the dark; inset shows the color of the MB solution (i) before adsorption, (ii) after adsorbed by  $\text{MoO}_{3-x}/\text{N-C}$  nanocomposite, respectively for (a), (b) and (c).

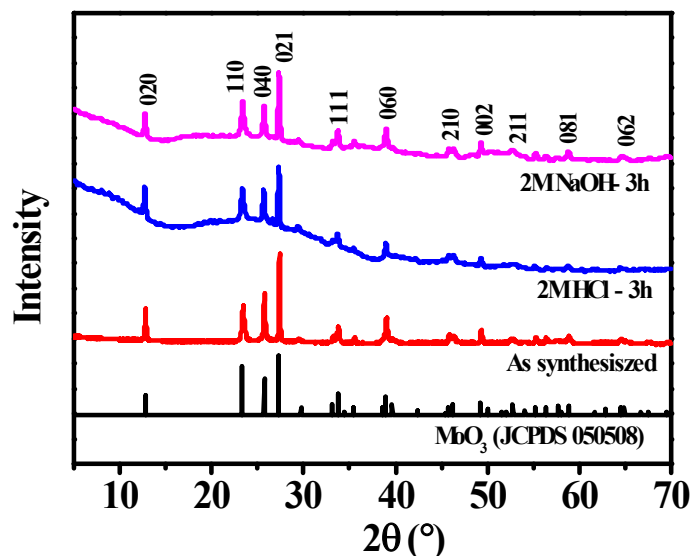

**Figure S15.** XRD pattern of the  $\text{MoO}_{3-x}/\text{N-C}$  nanocomposite before and after corroded for 3 h using 2(M) HCl and 2(M) NaOH solution at pH 1 and pH 9 respectively.

## References

1. N. Kumar and R. Kumar, Efficient adsorption of methylene blue on hybrid structural phase of  $\text{MoO}_3$  nanostructures, *Mater. Chem. Phys.*, 2022, **275**, 125211.
2. M. L. de Sá, F. X. Nobre, L. d. S. Silva, G. d. S. Sousa, M. L. Takeno, E. A. J. Junior, J. M. E. d. M. Matos and M. R. M. C. d. Santos, Preparation of new *h*- $\text{MoO}_3$  rod-like microcrystals for effective removal of cationic dye in aqueous solution, *Int. J. Environ. Res.*, 2021, **15**, 105-124.
3. E. Taghipour and N. Tahmasebi, One-step hydrothermal synthesis of  $\text{MoO}_3/\text{MoO}_2$  composite for efficient removal of methylene blue from aqueous solutions, *Mater. Today Commun.*, 2021, **26**, 102012.
4. S. Huang, Y. Long, H. Yi, Z. Yang, L. Pang, Z. Jin, Q. Liao, L. Zhang, Y. Zhang, Y. Chen, H. Cui, J. Lu, X. Peng, H. Liang, S. Ruan and Y.-Z. Zeng, Multifunctional molybdenum oxide for solar-driven water evaporation and charged dyes adsorption, *Appl. Surf. Sci.*, 2019, **491**, 328-334.

5. D. Zhao, X. Zhang, H. Huan, X. Dong, H. Zhu, Z. Li, Y. Qi, J. Hu and X. Zeng, Facile synthesis of MoO<sub>3</sub> nanospheres and their application in water treatment, *Mater. Lett.*, 2019, **256**, 126648.
6. S. Rakass, H. Oudghiri Hassani, M. Abboudi, F. Kooli, A. Mohmoud, A. Aljuhani and F. Al Wadaani, Molybdenum Trioxide: Efficient Nanosorbent for Removal of Methylene Blue Dye from Aqueous Solutions, *Molecules*, 2018, **23**, 2295.
7. M. Santos-Beltra, F. Paraguay-Delgado, R. Garcia, W. Antu'nez-Flores, C.Ornelas-Gutierrez and A. Santos-Beltra, Fast methylene blue removal by MoO<sub>3</sub> nanoparticles, *J. Mater. Sci. Mater. Electron.*, 2017, **28**, 2935-2948.
8. M. Wang, X.-X. Song, X.-L. Cheng, X. Zhou, X.-f. Zhang, Z. Cai, Y.-M.Xu, S.Gao, H. Zhao and L.-H. Huo, Highly selective and efficient adsorption dyes self-assembled by 3D hierarchical architecture of molybdenum oxide, *RSC Adv.*, 2015, **5**, 85248-85255.
9. D. Zhang, J. Li, J. Liang, H. Li and Y. Yan, Self-assembly of  $\alpha$ -MoO<sub>3</sub> flower as a highly effective organics adsorbent for water purification, *J. Am. Ceram. Soc.*, 2019, **102**, 3307-3317.
10. S. Dhanavel, E. A. K. Nivethaa, K. Dhanapal, V. K. Gupta, V. Narayanan and A. Stephen,  $\alpha$ -MoO<sub>3</sub>/polyaniline composite for effective scavenging of rhodamine B, congo red and textile dye effluent, *RSC Adv.*, 2016, **6**, 28871-28886.
11. H. Lahan, R. Roy, N. D. Namsa and S. K. Das, MoO<sub>3</sub> nanoparticle anchored graphene as bifunctional agent for water purification, *Mater. Res. Express.*, 2016, **3**, 105003.
